# Supplementary material for: Dental caries and their association with socioeconomic characteristics, oral hygiene practices and eating habits among preschool children in Abu Dhabi, United Arab Emirates — the NOPLAS project
Source: Springer Nature journal article supplement (doi:10.1186/s12903-018-0557-8), 2018-06-08
Supplement: MOESM1 [file 15831896]

**Child's name**.....**Nursery**.....  
**Interviewer**..... **Date: DD/MM/YY** .....

---

## **A. Contact details**

**Contact person**.....

**Relation to Child:** .....

**Mobile no.**.....**Landline no.** .....

**E-mail address**.....

**Address**.....

## **B. Demographics**

**1. Child's date of birth** .....

**2. Gender**

- A. Boy
- B. Girl

**3. Nationality:**..... **Country of origin:** .....

**4. How many siblings does the child have?**.....

**5. What is the child's birth order?** .....

**6. Years of residence as a family in UAE (for non-Emiratis)**

- A. 0-5 years
- B. 6-10 years
- C. 11-20 years
- D. More than 20 years

**7. Who does the child live with? (tick all that applies)**

- A. Parent(s)
- B. Uncle/aunt
- C. Grandparent(s)
- D. Siblings
- E. Other(s) Please specify .....

**8. Marital status of the child's parents:**

- A. Married
- B. Divorced
- C. Widowed
- D. Separated
- E. Other

**9. Mother's occupation**

- A. Housewife

- B. Self-employed
- C. Part time outside home
- D. Full time outside home.

**10. Mother's education:**

- A. None
- B. Primary school
- C. Middle/Secondary/High school or equivalency
- D. Bachelor's degree
- E. Higher education: Master's degree/Doctorate

**11. Father's occupation.....**

- A. Stay-home father
- B. Self-employed
- C. Part time outside home
- D. Full time outside home.

**12. Father's education:**

- A. None
- B. Primary school
- C. Middle/Secondary/High school or equivalency
- D. Bachelor's degree
- E. Higher education: Master's degree/Doctorate

**13. How do you rate yourself financially?**

- A. Poor
- B. Lower middle income level
- C. Middle income level
- D. Higher middle income level
- E. Wealthy

**C. Eating habits and eating pattern**

Think about a typical month in your **child's life** while answering how often your child on average is consuming the following food items. Tick the category that applies to your child's eating habits

| <b>Food item</b>                                          | <b>More than one time/day</b> | <b>6-7 times/ week</b> | <b>3-5 times/ week</b> | <b>1-2 times/ week</b> | <b>Less than once per week or never</b> |
|-----------------------------------------------------------|-------------------------------|------------------------|------------------------|------------------------|-----------------------------------------|
| Full fat milk/ yoghurt/Laban                              |                               |                        |                        |                        |                                         |
| Low fat milk/ yoghurt/labani                              |                               |                        |                        |                        |                                         |
| Flavoured milk (chocolate, strawberry, banana or similar) |                               |                        |                        |                        |                                         |
| Breastmilk                                                |                               |                        |                        |                        |                                         |
| Formula milk                                              |                               |                        |                        |                        |                                         |
| Hard cheese (like cheddar, parmesan)                      |                               |                        |                        |                        |                                         |
| Cream cheese/Labnah                                       |                               |                        |                        |                        |                                         |
| Feta cheese/halloumi/ mozzarella                          |                               |                        |                        |                        |                                         |

|                                                                                                           |                           |                     |                    |                    |                                           |
|-----------------------------------------------------------------------------------------------------------|---------------------------|---------------------|--------------------|--------------------|-------------------------------------------|
| Muffins/Donuts/<br>Pandesal /chocolate<br>croissants/pancakes/<br>waffles or similar                      |                           |                     |                    |                    |                                           |
| Savoury<br>Croissants(zaata,<br>cheese)/Paratha/<br>Samosa or similar                                     |                           |                     |                    |                    |                                           |
| Toast/Lebanese<br>bread/pita bread<br>/bagels/bread/chapatis<br>or similar                                |                           |                     |                    |                    |                                           |
| Biquits/cookies/<br>crackers/ Arabic sweets                                                               |                           |                     |                    |                    |                                           |
| Porridge (oat, barley,<br>wheat, corn or similar)                                                         |                           |                     |                    |                    |                                           |
| Meat (whole pieces)<br>Beef/lamb/camel                                                                    |                           |                     |                    |                    |                                           |
| Bacon<br>/Sausages/Hotdogs                                                                                |                           |                     |                    |                    |                                           |
| Minced meat/kebabs                                                                                        |                           |                     |                    |                    |                                           |
| Fatty fish (salmon,<br>tuna, Markel, sardines)                                                            |                           |                     |                    |                    |                                           |
| Lean fish (Hammour,<br>sherry or other white<br>fish)                                                     |                           |                     |                    |                    |                                           |
| Food item                                                                                                 | More than one<br>time/day | 6-7 times/<br>week) | 3-5 times/<br>week | 1-2 times/<br>week | Less than<br>once per<br>week or<br>never |
| Lentils/Dried<br>beans/chickpeas/<br>hummus                                                               |                           |                     |                    |                    |                                           |
| Eggs/omelette/<br>scrambled eggs                                                                          |                           |                     |                    |                    |                                           |
| Yellow/orange/red<br>vegetables (like carrot,<br>pepper, corn,<br>tomatoes,, pumpkin,<br>sweet potatoes ) |                           |                     |                    |                    |                                           |
| Green vegetables<br>(peas, lettuce, squash,<br>zucchini, spinach)                                         |                           |                     |                    |                    |                                           |
| White vegetables<br>(onion, cauliflower,<br>potatoes, parsnip or<br>similar)                              |                           |                     |                    |                    |                                           |
| Fresh fruits/ fruit salad                                                                                 |                           |                     |                    |                    |                                           |
| Dried fruits (raisins,<br>apricots, dates, figs)                                                          |                           |                     |                    |                    |                                           |
| Juices (packed or                                                                                         |                           |                     |                    |                    |                                           |

|                                                      |                        |                  |                 |                 |                                  |
|------------------------------------------------------|------------------------|------------------|-----------------|-----------------|----------------------------------|
| fresh)                                               |                        |                  |                 |                 |                                  |
| Rice                                                 |                        |                  |                 |                 |                                  |
| Pasta/spaghetti                                      |                        |                  |                 |                 |                                  |
| Other grains like quinoa, bulgur, barley             |                        |                  |                 |                 |                                  |
| Nutella/ peanut butter                               |                        |                  |                 |                 |                                  |
| Chips (crips), Indian spice snack mixes/French fries |                        |                  |                 |                 |                                  |
| Nuts, almonds                                        |                        |                  |                 |                 |                                  |
| Butter/margarine for sandwiches                      |                        |                  |                 |                 |                                  |
| Mayonnaise                                           |                        |                  |                 |                 |                                  |
| Mortadella/Smoked turkey/ham/beef (for sandwiches)   |                        |                  |                 |                 |                                  |
| Whip cream/crème fraiche/full fat labnah             |                        |                  |                 |                 |                                  |
| Low fat cream/crème fraiche/low fat labnah           |                        |                  |                 |                 |                                  |
| Food item                                            | More than one time/day | 6-7 times/ week) | 3-5 times/ week | 1-2 times/ week | Less than once per week or never |
| Syrups/fruit punches/fruits squats/TANG              |                        |                  |                 |                 |                                  |
| Soft drinks                                          |                        |                  |                 |                 |                                  |
| Soft drinks light                                    |                        |                  |                 |                 |                                  |
| Ice cream                                            |                        |                  |                 |                 |                                  |
| Chocolates                                           |                        |                  |                 |                 |                                  |
| Candy /sweets (other than chocolate)                 |                        |                  |                 |                 |                                  |

## **D. Oral health**

**1. How do you rate the health status of your child's mouth and teeth?**

- A. Very good
- B. Satisfactory
- C. Dissatisfactory
- D. Very dissatisfactory

**2. Are you satisfied with your child's teeth appearance?**

- A. Very satisfied
- B. Satisfied
- C. Dissatisfied
- D. Very dissatisfied

**3. Has your child visited a dentist before?**

- A. Yes
- B. No

**4. If yes, why did your child visit the dental clinic? (Tick all that applies)**

- A. Regular check-ups
- B. Toothache
- C. Accident/Trauma
- D. Swollen gums
- E. Loose teeth
- F. Prevention treatment to reduce caries
- G. Bleeding
- H. Others (please specify).....

**5. What form of treatment did your child receive before in the dental clinic? (Tick all that applies)**

- A. Filling
- B. Extraction
- C. Braces
- D. Fissure sealant (preventive treatment)
- E. Other (please specify).....

**6. Does your child brush his/her teeth everyday?**

- A. Yes
- B. No

**7. If yes, how many times a day does your child brush his/her teeth?**

- A. Once a day
- B. Twice a day
- C. Three times a day
- D. Other (please specify)

**8. If no, how often does your child brush his/her teeth?**

- A. Never
- B. Once every two days
- C. Once every three days
- D. Once a week
- E. Irregularly
- F. Other (please specify) .....

**9. Who brushes your child's teeth?**

- A. I/Adult brush my child's teeth
- B. My child brush her/his own teeth
- C. My child brush her/his own teeth with help of an adult

**10. When does the child brush his/her teeth? (Tick all that applies)**

- A. My child doesn't brush her/his teeth
- B. Morning
- C. Afternoon
- D. Before going to bed
- E. Before meals
- F. After meals
- G. No routine is being followed

**11. What does use child use to brush his/her teeth? (Tick all that applies)**

- A. Regular toothbrush
- B. Electric toothbrush
- C. Dental floss
- D. Mouth wash
- E. Others(Please specify).....

**12. Does your child currently have any dental complains?**

- A. No
- B. Yes, **Please specify which of the following (Tick all that applies):**
  - A. Pain due to caries
  - B. Pain due to trauma/accident
  - C. Swollen gums
  - D. Loose teeth
  - E. Bleeding
  - F. Chewing difficulties
  - G. Orthodontic problems
  - H. Speech problems
  - I. Others(please specify).....

**13. How does your child drink liquids? (Tick all that applies)**

- A. Bottle
- B. Sippy cup
- C. Regular cup
- D. Others, (Please specify).....

**14. Do you use any traditional teething or weaning practices, or any soothing instruments?**

- A. Yes, (Please describe).....
- B. No

**E. General health**

Please circle the answer that best applies to you/your child and complete the empty gaps

1. **Birth weight** \_\_\_\_\_ kilogram/pounds **Birth height** \_\_\_\_\_ cm/inches
2. **My child was born in pregnancy week**
  - a. < 37 weeks (preterm)
  - b. 38-41 weeks (on term)
  - c. ≥ 41 weeks (post term)
3. **Was your child breast-fed?**
  - a. Yes
  - b. No
4. **To my knowledge**
  - a. My child has a normal growth
  - b. My child has struggled to grow and gain weight

- c. My child has increased too much in size

**5. My child is**

- a. Healthy (*skip to Q 8*)
- b. Has a chronic condition, specify what \_\_\_\_\_
- c. Has food intolerance/food allergy, specify what \_\_\_\_\_

**6. If your child has any health conditions, has it been diagnosed by a medical doctor**

- a. Yes
- b. No
- c. We know that our child has it thanks to internet/friends/family

**7. My child takes medication on a regular basis**

- a. Yes, specify what and how often \_\_\_\_\_
- b. No, my child does not take medication unless prescribed by a medical doctor
- c. No, my child is only treated with herbs or other alternative medications if needed

**8. We give our child vitamin and mineral supplementation**

- a. Yes, please specify type \_\_\_\_\_ specify since when \_\_\_\_\_
- b. No
